# Supplementary material
Source: PubMed Central journal article supplement (PMC4891972)
Supplement: NIHMS784719-supplement-06.pdf [file NIHMS784719-supplement-06.pdf]

**A**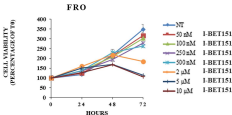**B**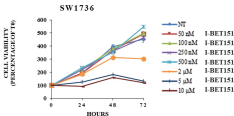

**Supplementary Figure 1.** BET inhibitors administration decreases proliferation of anaplastic thyroid carcinoma cell lines. Panels A and B; FRO and SW1736 were exposed to I-BET151 different doses (ranging from 50 nM to 10  $\mu$ M). Cell viability was determined by MTT assay after 0, 24, 48 and 72 h and expressed as a percentage of baseline samples (T0). All samples were run in quadruplicate. Data are representative of 3 independent experiments.
