# Supplementary material
Source: PubMed Central journal article supplement (PMC4891972)
Supplement: NIHMS784719-supplement-07.pdf [file NIHMS784719-supplement-07.pdf]

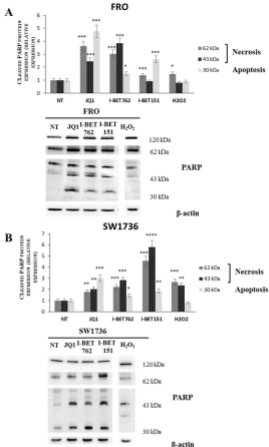

**Supplementary Figure 2. BET inhibitors administration increases cell death phenomena in anaplastic thyroid carcinoma cell lines.** Panel A and B; FRO and SW1736 cells were treated either with 5  $\mu$ M JQ1, I-BET762, I-BET151 or vehicle for 48 h and PARP protein levels were detected by western blotting. Vehicle-treated (NT) cells were arbitrarily set at 1.0 and protein levels were expressed as relative expression values. Hydrogen peroxide (5  $\mu$ M) was used as a positive control for necrosis. Results are shown as mean  $\pm$  SD. \*\*  $p < 0.01$ , \*\*\*  $p < 0.001$ , \*\*\*\*  $p < 0.0001$  by ANOVA test. Data are representative of 3 independent experiments.
