# Supplementary material
Source: PubMed Central journal article supplement (PMC4891972)
Supplement: NIHMS784719-supplement-08.pdf [file NIHMS784719-supplement-08.pdf]

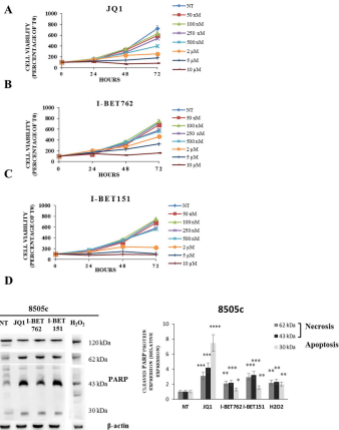

**Supplementary Figure 3. BET inhibitors administration decreases proliferation and survival of a third anaplastic thyroid carcinoma cell line.** Panels A, B and C: 8505c were exposed to JQ1, I-BET762 or I-BET151 different doses (rising from 50 nM to 10  $\mu$ M). Cell viability was determined by MTT assay after 0, 24, 48 and 72 h and expressed as a percentage of baseline samples (T0). All samples were run in quadruplicate. Panel D: 8505c cells were treated either with 5  $\mu$ M JQ1, I-BET762, I-BET151 or vehicle for 48 h and PARP protein levels were detected by western blotting. Hydrogen peroxide (5  $\mu$ M) was used as a positive control for necrosis. Vehicle-treated (NT) cells were arbitrarily set at 1.0 and protein levels were expressed as relative expression values. Each sample was run in triplicate. \*  $p < 0.05$ , \*\*  $p < 0.01$ , \*\*\*  $p < 0.001$ , \*\*\*\*  $p < 0.0001$  by ANOVA test.
