# Supplementary material
Source: PubMed Central journal article supplement (PMC4891972)
Supplement: NIHMS784719-supplement-09.pdf [file NIHMS784719-supplement-09.pdf]

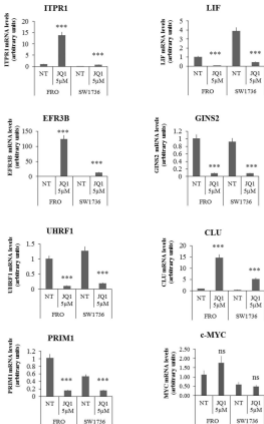

**Supplementary Figure 4. Gene expression modifications in ATC cell lines after JQ1 treatment.** mRNA expression of ITPR1, LIF, EFR3B, GINS2, PRIM1, UHRF1, c-MYC, CLU, in FRO and SW1736 cell lines was evaluated by qPCR using  $\beta$ -actin as internal control. Cells were treated either with 5  $\mu$ M JQ1 or vehicle for 24 hours. Basal expression (NT) of FRO cells was set at 1.0 and mRNA levels are expressed as relative expression values. Results are shown as mean  $\pm$  SD. All samples were run in triplicate. \*\*\*  $p < 0.001$  by ANOVA test.
