# Supplementary material
Source: PubMed Central journal article supplement (PMC4891972)
Supplement: NIHMS784719-supplement-10.pdf [file NIHMS784719-supplement-10.pdf]

**A**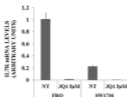**B**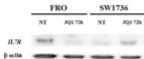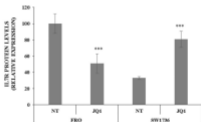

**Supplementary Figure 5. JQ1-induced modification of *IL7R* expression in human ATC cell lines.** Panel A; FRO and SW1736 cells were treated either with 5  $\mu$ M JQ1 or vehicle for 24 hours and *IL7R* mRNA expression was evaluated by qPCR. All samples were run in triplicate. Vehicle-treated (NT) FRO cells were arbitrarily set at 1.0 and mRNA levels are expressed as relative expression values. Panel B; FRO and SW1736 were treated either with 5  $\mu$ M JQ1 or vehicle for 72 h and *IL7R* protein levels were detected by western blotting. Panel C; densitometric analysis of *IL7R* protein levels in ATC cells after 5  $\mu$ M JQ1 or vehicle treatment. Results are shown as mean  $\pm$  SD. \*\*\*  $p < 0.001$ , by ANOVA test. Data are representative of 3 independent experiments.
